# Supplementary material for: A One-Year Retrospective Analysis of Viral and Parasitological Agents in Wildlife Animals Admitted to a First Aid Hospital
Source: MDPI journal article supplement (doi:10.3390/ani13050931), 2023-03-04
Supplement: s1 [file s1]

SUPPLEMENTARY DATA

**Table S1.** Summary of the specie-specific panels for virological molecular investigations.

|                      | ROE DEER AND<br>FALLOW DEER | FOX                                   | BADGER AND PINE MARTEN                | PORCUPINE |
|----------------------|-----------------------------|---------------------------------------|---------------------------------------|-----------|
| BOCAVIRUS            | BoV spp                     | CBoV 1<br>CBoV 2<br>CBoV 3<br>BoV spp | CBoV 1<br>CBoV 2<br>CBoV 3<br>BoV spp | BoV spp   |
| PARVOVIRUS           | --                          | CPV<br>FPV                            | CPV<br>FPV                            | --        |
| ADENOVIRUS           | --                          | CAdV 1<br>CAdv 2                      | CAdV 1<br>CAdv 2                      | --        |
| TORQUE TENO<br>VIRUS | --                          | TTV1<br>TTV2                          | TTV1<br>TTV2                          | --        |
| PESTIVIRUS           | BVDV<br>Pestivirus spp      | --                                    | --                                    | --        |
| MORBILLIVIRUS        | --                          | CDV                                   | CDV                                   | --        |
| BOPIVIRUS            | BopV spp                    | --                                    | --                                    | --        |
| KOBUVIRUS            | KoV spp                     | KoV spp                               | KoV spp                               | KoV spp   |
| CORONAVIRUS          | CoV spp                     | CoV spp                               | CoV spp                               | CoV spp   |
| ASTROVIRUS           | AstV spp                    | AstV spp                              | AstV spp                              | AstV spp  |

**Table S2.** The primer sets used in the study.

|         | PRIMERS SEQUENCES                                                                                                                | MELTING<br>T° (°C) | AMPLION<br>LENGTH (bp)      | REFERENCE               |
|---------|----------------------------------------------------------------------------------------------------------------------------------|--------------------|-----------------------------|-------------------------|
| CBoV 1  | Fw1: CARTGGTAYGCTCCMATYTTTAA<br>Rw1: TGGCTCCCGTCACAAAATKATRTG<br>Fw2: TGGTAYGCTCCMATYTTTAAAYGG<br>Rw2: GCTCCCGTCACAAAATKATRTGAAC | 55                 | 400                         | Kapoor et al., 2012     |
| CBoV 2  | Fw: AGGTCGGCCACTGGCTGT<br>Rw: CAGCTTAACGGCATTCACTA                                                                               | 55                 | 128                         | Lau et al., 2012        |
| CBoV 3  | Fw1: CAGATTTGGGGGTCCTGCAT<br>Rw1: GCACTGTCTGCGCTGAAAAA<br>Fw2: ATGCCGTCACCAATCCACAT<br>Rw2: AGCTTGTGGTGGACAGTAGC                 | 55                 | 173                         | Li et al., 2013         |
| BoV spp | Fw: GCCAGCACNNGNAARACMAA<br>Rw: CATNAGNCAITCYTCCCACCA                                                                            | 55                 | 141                         | Lau et al., 2012        |
| CPV     | Fw:<br>ACAAGATAAAAAGACGTGGTGTAACCTCAA<br>Rw: CAACCTCAGCTGGTCTCATAATAGT                                                           | 55                 | 193                         | Schatzberg et al., 2003 |
| FPV/CPV | Fw:<br>ACAAGATAAAAAGACGTGGTGTAACCTCAA<br>Rw: CAACCTCAGCTGGTCTCATAATAGT                                                           | 55                 | 83                          | Ndiana et al., 2021     |
| CAdV    | Fw: CGCGCTGAACATTACTACCTTGTC<br>Rw: CCTAGAGCACTTCGTGTCCGCTT                                                                      | 58                 | CAdV-1: 508<br>CAdV-2: 1030 | Hu et al., 2001         |
| TTV 1   | Fw: CGGGTTCAGGAGGCTCAAT<br>Rw: GCCATTGCGAAGTGCACCTTACT                                                                           | 55                 | 305                         | Segales et al., 2009    |
| TTV 2   | Fw: TCATGACAGGGTTCACCGGA<br>Rw: CGTCTGCGCACTTACTTATATACTCTA                                                                      | 55                 | 252                         | Segales et al., 2009    |
| BVDV    | Fw: ATGCCCWTAGTAGGACTAGCA                                                                                                        | 53                 | 288                         | Vilcek et al., 1994     |

|                       |                                                                                                                                                        |    |     |                      |
|-----------------------|--------------------------------------------------------------------------------------------------------------------------------------------------------|----|-----|----------------------|
|                       | Rw: TCAACTCCATGTGCCATGTAC                                                                                                                              |    |     |                      |
| <b>Pestivirus spp</b> | Fw: GATGCCATGTGGACGAGGGC<br>Rw: CATGTGCCATGTACAGCAGAG                                                                                                  | 55 | 150 | Goto et al., 2021    |
| <b>CDV</b>            | Fw: ACTTCCGCGATCTCCACTGG<br>Rw: GCTCCACTGCATCTGTATGG                                                                                                   | 60 | 177 | Conceição-Neto, 2017 |
| <b>BopV spp</b>       | Fw: CTGRGCAAGTTCACCAACAA<br>Rw: GTCCATGACAGGGTGAATCA                                                                                                   | 52 | 627 | Laszlo et al., 2021  |
| <b>KoV spp</b>        | Fw: TGGAYTACAAGTGTGTTTGATGC<br>Rw: ATGTTGTTRATGATGGTGTGA                                                                                               | 53 | 216 | Reuter 2009          |
| <b>CoV spp</b>        | Fw1: GGKTGGGAYTAYCCKAARTG<br>Rw1: TGYTGTSWRCARAAAYTCRTG<br>Fw2: GGTGGGACTATCCTAAGTGTGA<br>Rw2: CCATCATCAGATAGAATCATCAT                                 | 48 | 440 | Chu et al., 2011     |
| <b>AstV spp</b>       | Fw1a: GARTTYGATTGGRCKCGKTAYGA<br>Fw1b: GARTTYGATTGGRCKAGGTAYGA<br>Fw2a: CGKTAYGATGGKACKATHCC<br>Fw2b: AGGTAYGATGGKACKATHCC<br>Rw: GGYTTKACCCACATNCCRAA | 50 | 422 | Chu et al., 2008     |

**Table S3.** Accession number of the sequences entered on the GenBank database and results of their analysis with the Blast software.

|              | Species     | GenBank Accession Number           | Sequence Length | Reference Sequence | Percent Identity | E Value           |
|--------------|-------------|------------------------------------|-----------------|--------------------|------------------|-------------------|
| <b>CAdV1</b> | Fox         | CAdV/fox/894/IT<br>OP851367        | 497             | Y07760.1           | 99,8%            | 0.0               |
|              | Badger      | CAdV/badger/153/IT<br>OP851366     | 497             | Y07760.1           | 99,6%            | 0.0               |
| <b>KoV</b>   | Roe deer    | kov/roedeer/149/IT<br>OP851362     | 218             | KF781169.1         | 96,33%           | 1e <sup>-94</sup> |
|              | Fox         | kov/fox/580/IT<br>OP851364         | 193             | JN387133.1         | 94,33%           | 8e <sup>-76</sup> |
|              | Badger      | Kov/badger/540/IT<br>OP851365      | 233             | KF781169.1         | 92,86%           | 2e <sup>-78</sup> |
|              | Porcupine   | kov/porcupine/1243/IT<br>OP851363  | 218             | KF781169.1         | 96,79%           | 2e <sup>-96</sup> |
| <b>AstV</b>  | Roe deer    | Mastv/roedeer/32/IT<br>OP851369    | 344             | MK004956.1         | 74,24%           | 1e <sup>-11</sup> |
|              | Fox         | Mastv/fox/1195/IT<br>OP851368      | 362             | MW504559.1         | 75,42%           | 1e <sup>-17</sup> |
| <b>BopV</b>  | Fallow deer | Bopv/fallowdeer/675/IT<br>OP851370 | 562             | MZ436972.1         | 94,66%           | 0.0               |
